# Supplementary material for: Design, Synthesis, and Evaluation of Homochiral Peptides Containing Arginine and Histidine as Molecular Transporters
Source: PubMed Central journal article supplement (PMC6100079; doi:10.3390/molecules23071590), 2018-06-29

# Design, Synthesis, and Evaluation of Homochiral Peptides Containing Arginine and Histidine as Molecular Transporters

**Naglaa Salem El-Sayed<sup>1,2</sup>, Taryn Miyake<sup>1</sup>, Amir Nasrolahi Shirazi<sup>1</sup>, Shang Eun Park<sup>1</sup>, Jimmy Clark<sup>1</sup>, Stephani Buchholz<sup>1</sup>, Keykavous Parang<sup>1</sup>, and Rakesh Tiwari<sup>1,\*</sup>**

- 1 Center for Targeted Drug Delivery, Department of Biomedical and Pharmaceutical Sciences, Chapman University School of Pharmacy, Harry and Diane Rinker Health Science Campus, Irvine, California 92618, United States;
- 2 Cellulose and Paper Department, National Research Center, Dokki 12622, Cairo, Egypt;

Correspondence: [tiwari@chapman.edu](mailto:tiwari@chapman.edu); Tel.: +1-714-516-5483

# Content

- MALDI-MS spectra of synthesized peptides. (Slide #3-16)

# 1. Linear (HR)<sub>4</sub>

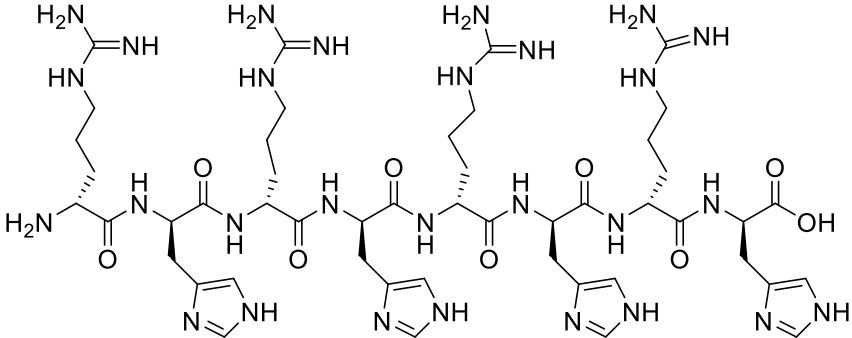

Chemical Formula: C<sub>48</sub>H<sub>78</sub>N<sub>28</sub>O<sub>9</sub>  
Exact Mass: 1190.6507

TOF/TOF™ Reflector Spec #1 [BP = 1191.6, 17891]

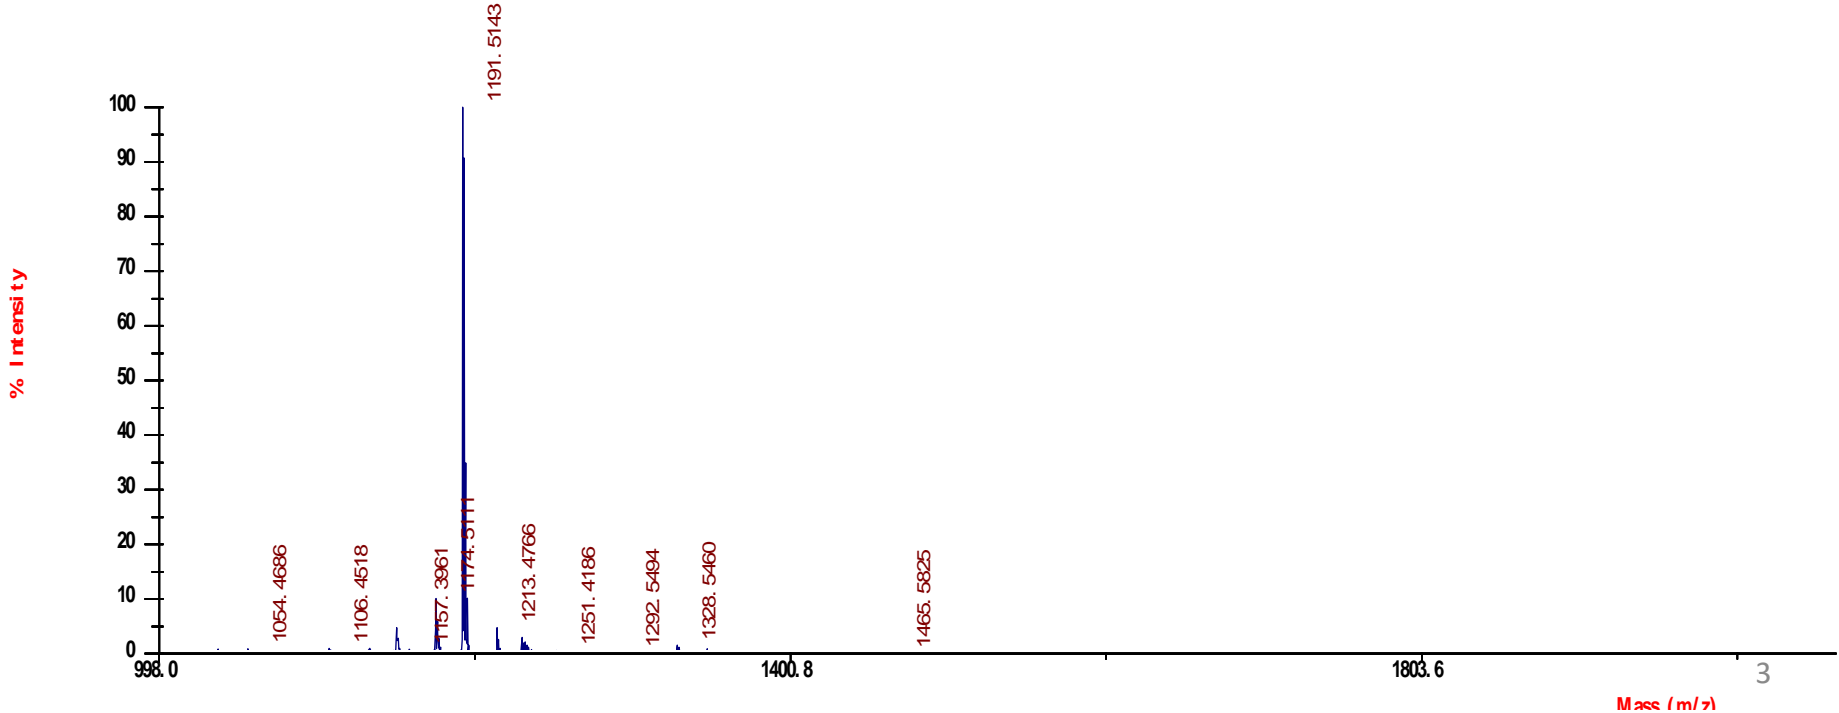

# 2. Cyclic [HR]<sub>4</sub>

Chemical Formula: C<sub>48</sub>H<sub>76</sub>N<sub>28</sub>O<sub>8</sub>  
Exact Mass: 1172.6401

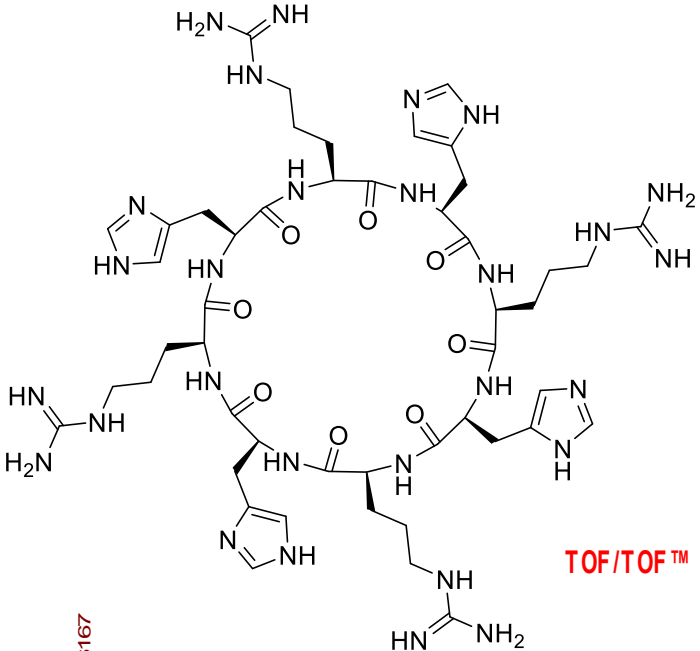

TOF/TOF™ Reflector Spec #1 [BP = 1173.6, 63]

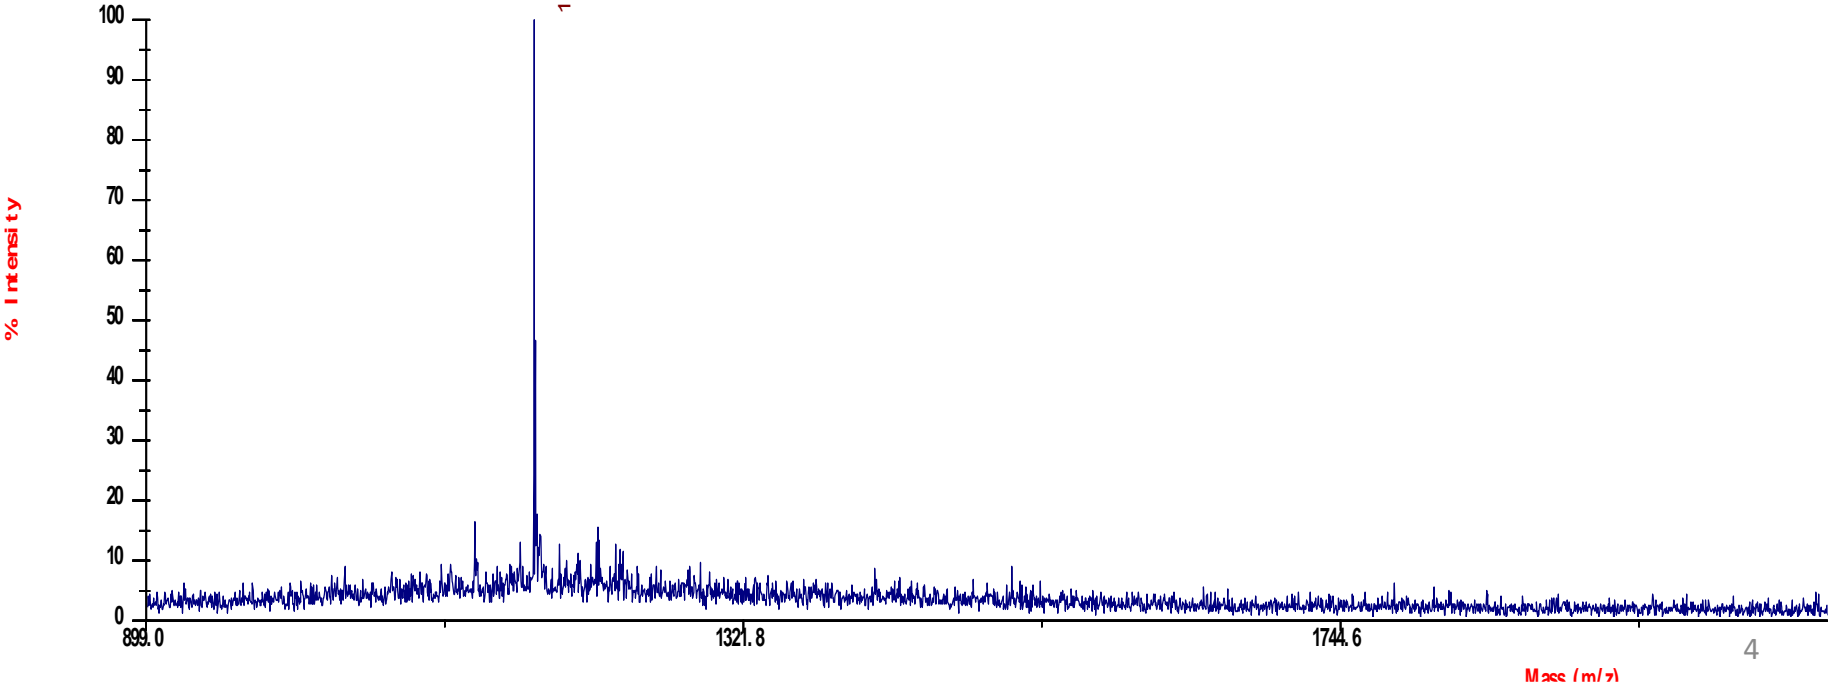

Mass (m/z)

### 3. Linear (HR)<sub>5</sub>

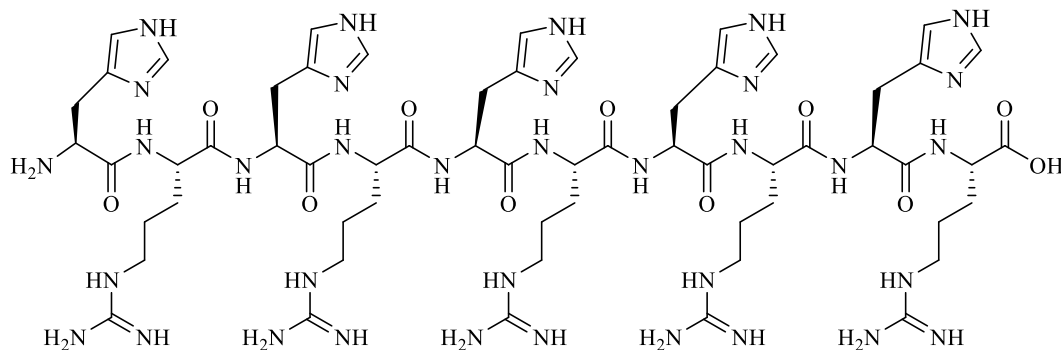

Chemical Formula: C<sub>60</sub>H<sub>97</sub>N<sub>35</sub>O<sub>11</sub>

Exact Mass: 1483.8107

TOF/TOF™ Reflector Spec #1[BP = 1484.7, 1879]

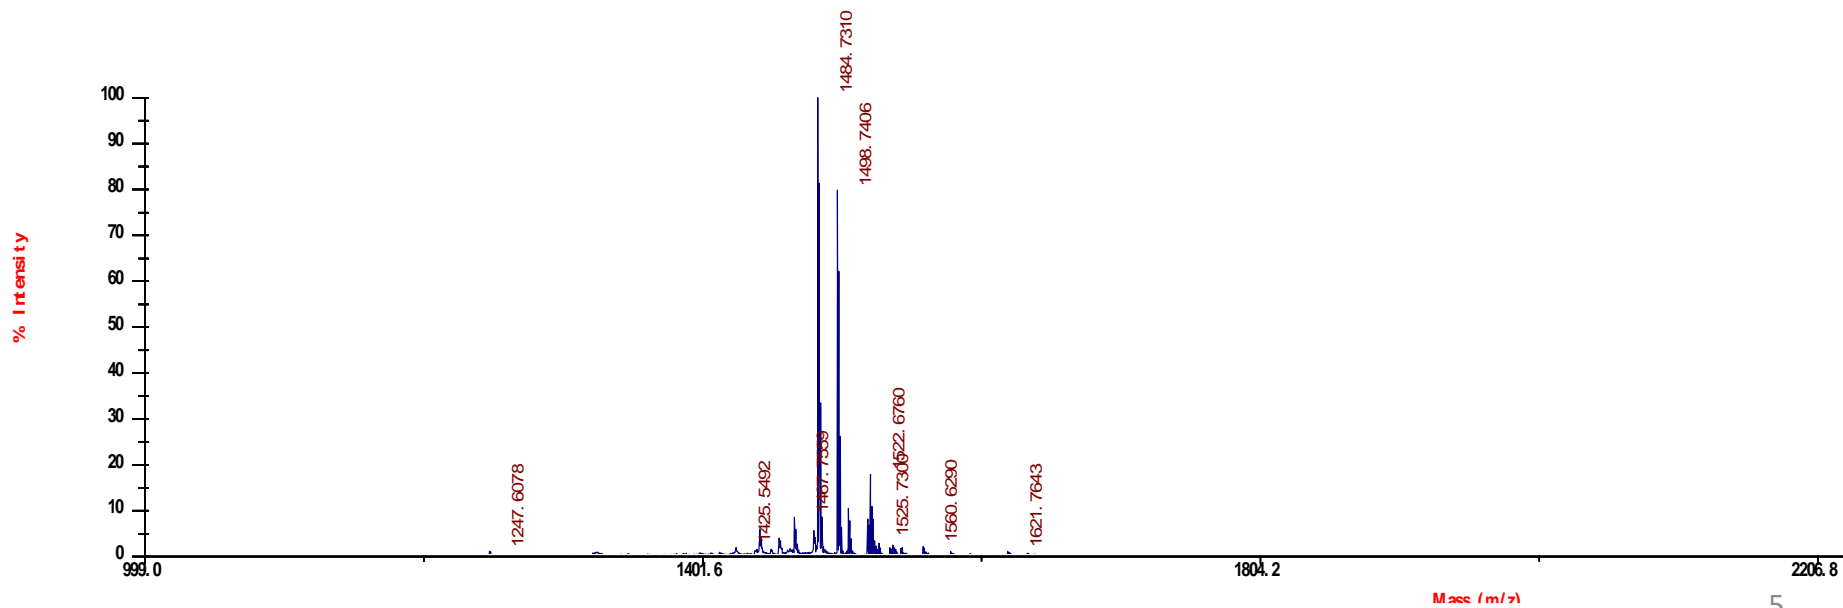

## 4. Cyclic [HR]<sub>5</sub>

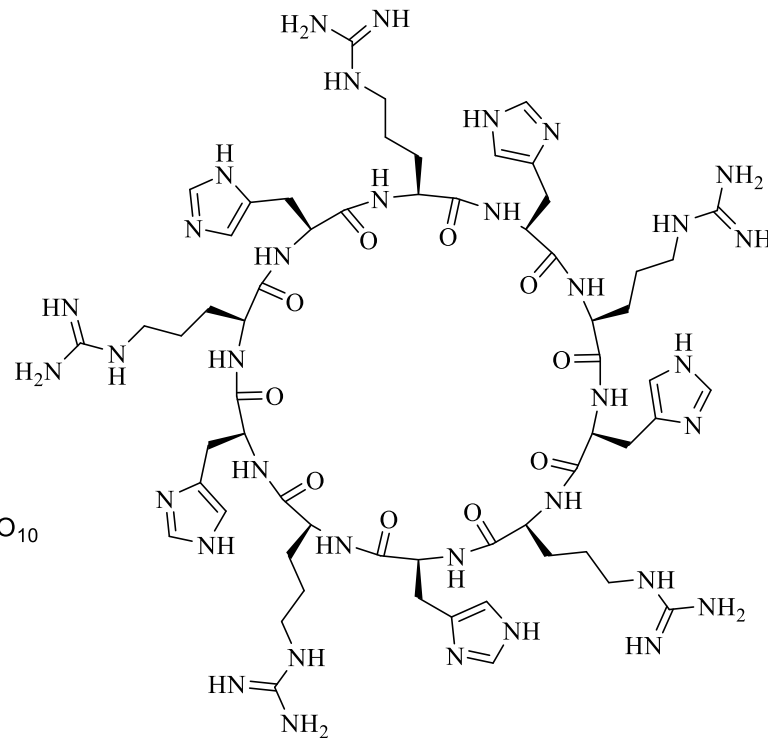

Chemical Formula: C<sub>60</sub>H<sub>95</sub>N<sub>35</sub>O<sub>10</sub>  
Exact Mass: 1465.8001

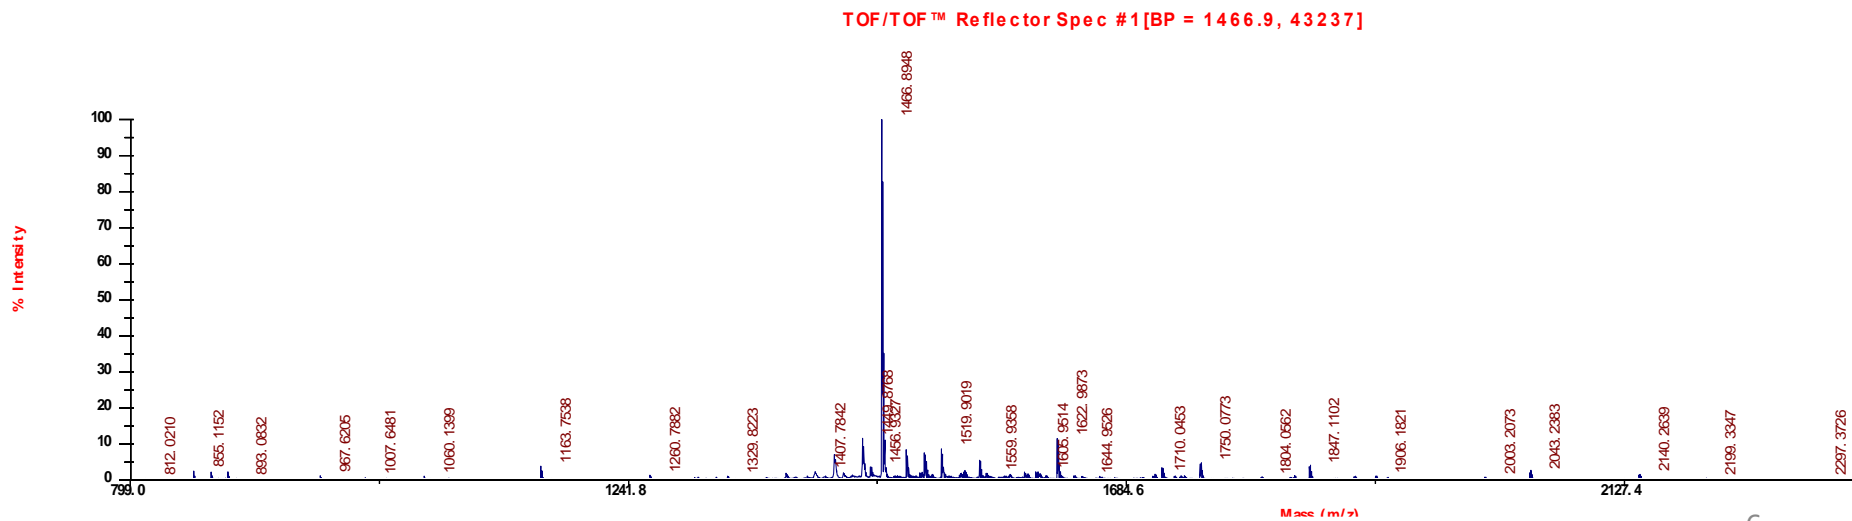

## 5. C<sub>2</sub>-(HR)<sub>4</sub>

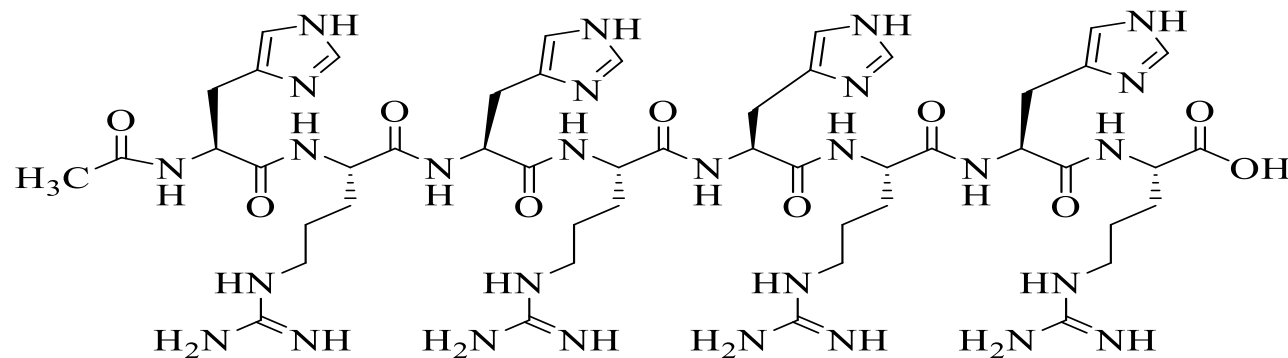

Chemical Formula: C<sub>50</sub>H<sub>80</sub>N<sub>28</sub>O<sub>10</sub>

Exact Mass: 1232.6612

TOF/TOF™ Reflector Spec #1[BP = 1233.6, 36318]

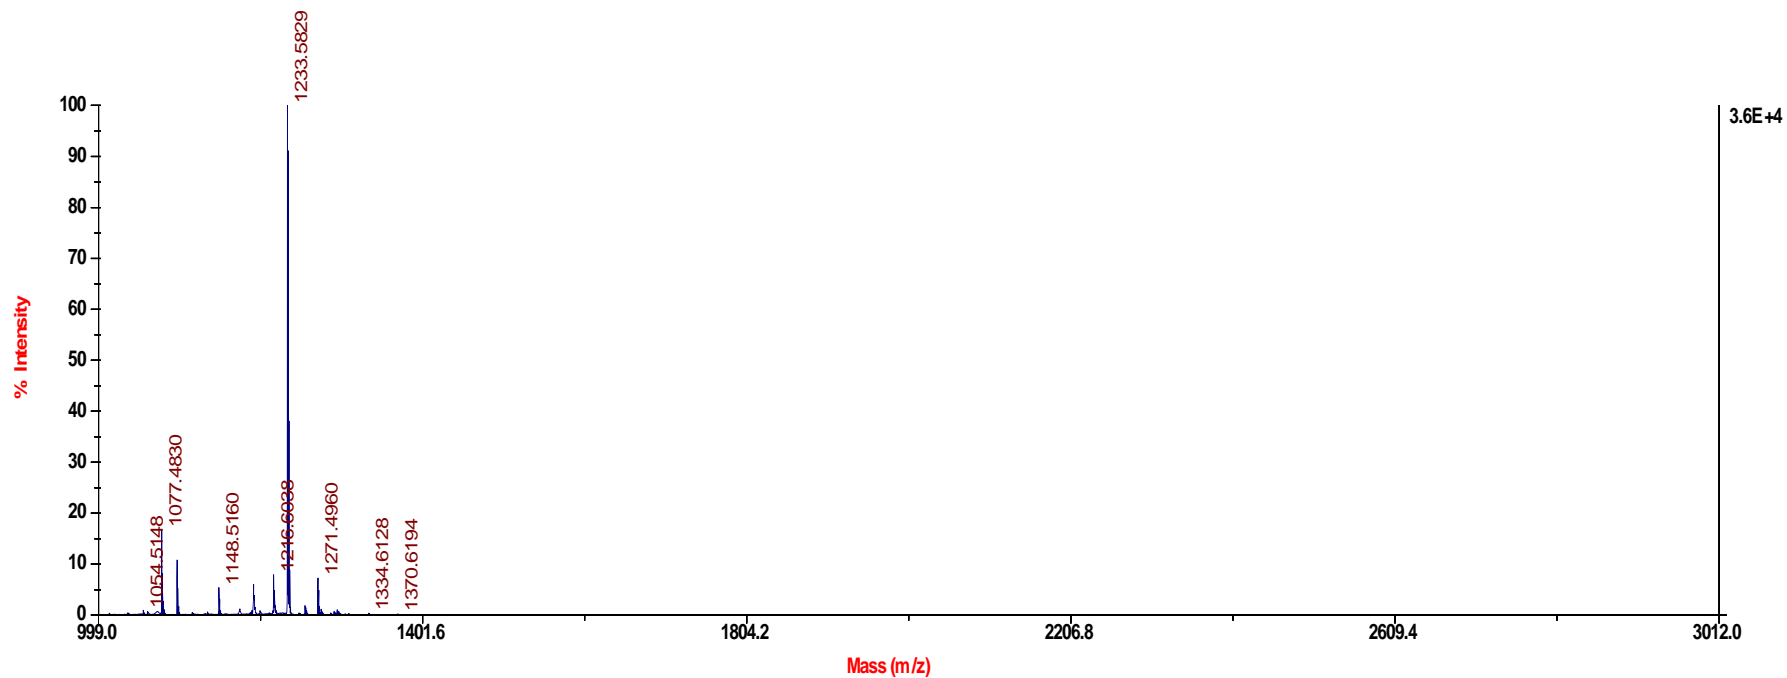

## 6. C<sub>8</sub>-(HR)<sub>4</sub>

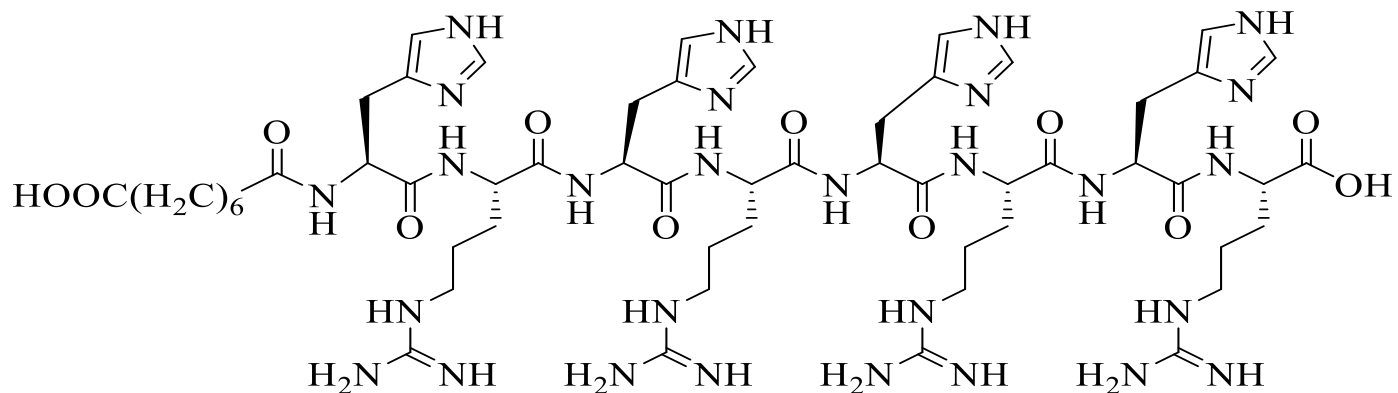

Chemical Formula: C<sub>56</sub>H<sub>90</sub>N<sub>28</sub>O<sub>12</sub>

Exact Mass: 1346.7293

TOF/TOF™ Reflector Spec #1[BP= 1347.6,11460]

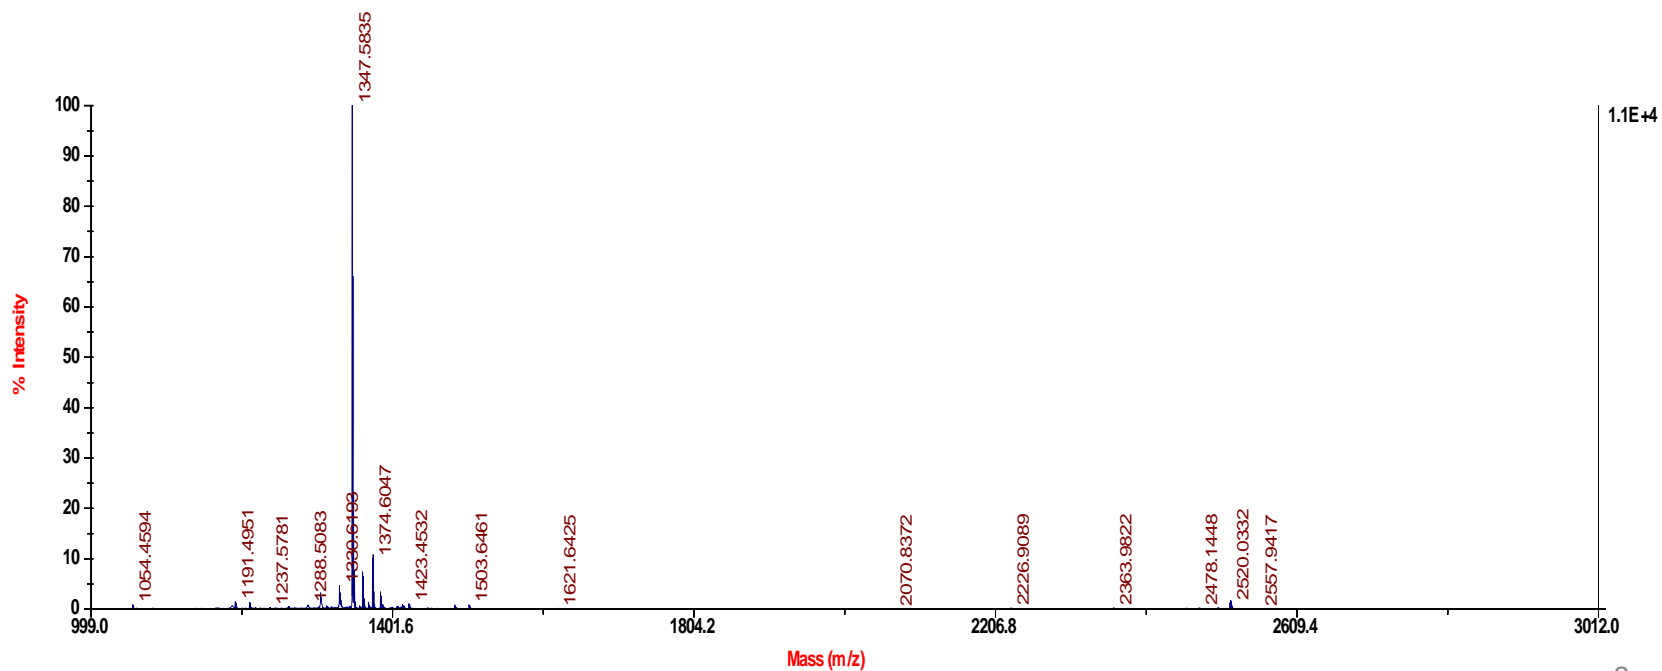



## 7. C<sub>12</sub>-(HR)<sub>4</sub>

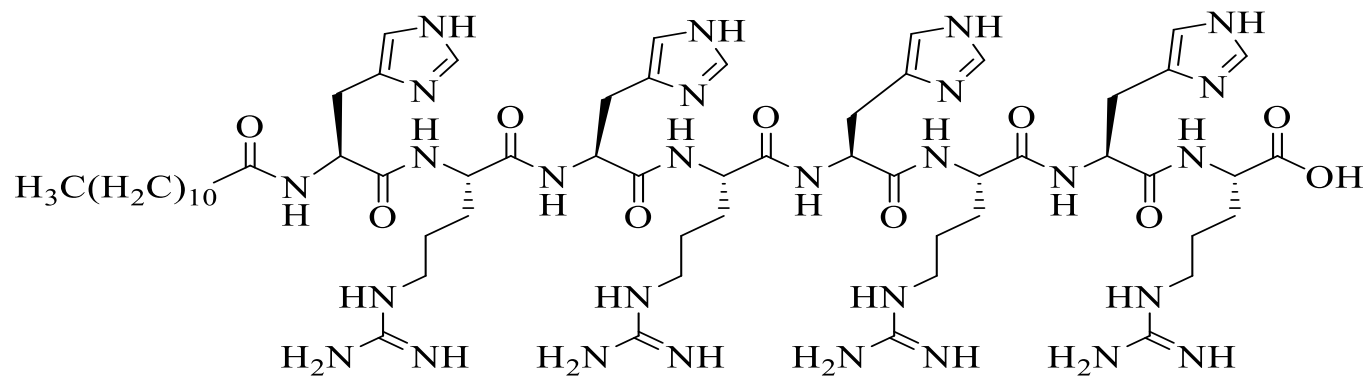

Chemical Formula: C<sub>60</sub>H<sub>100</sub>N<sub>28</sub>O<sub>10</sub>

Exact Mass: 1372.8177

TOF/TOF™ Reflector Spec #1[BP= 1373.8, 4773]

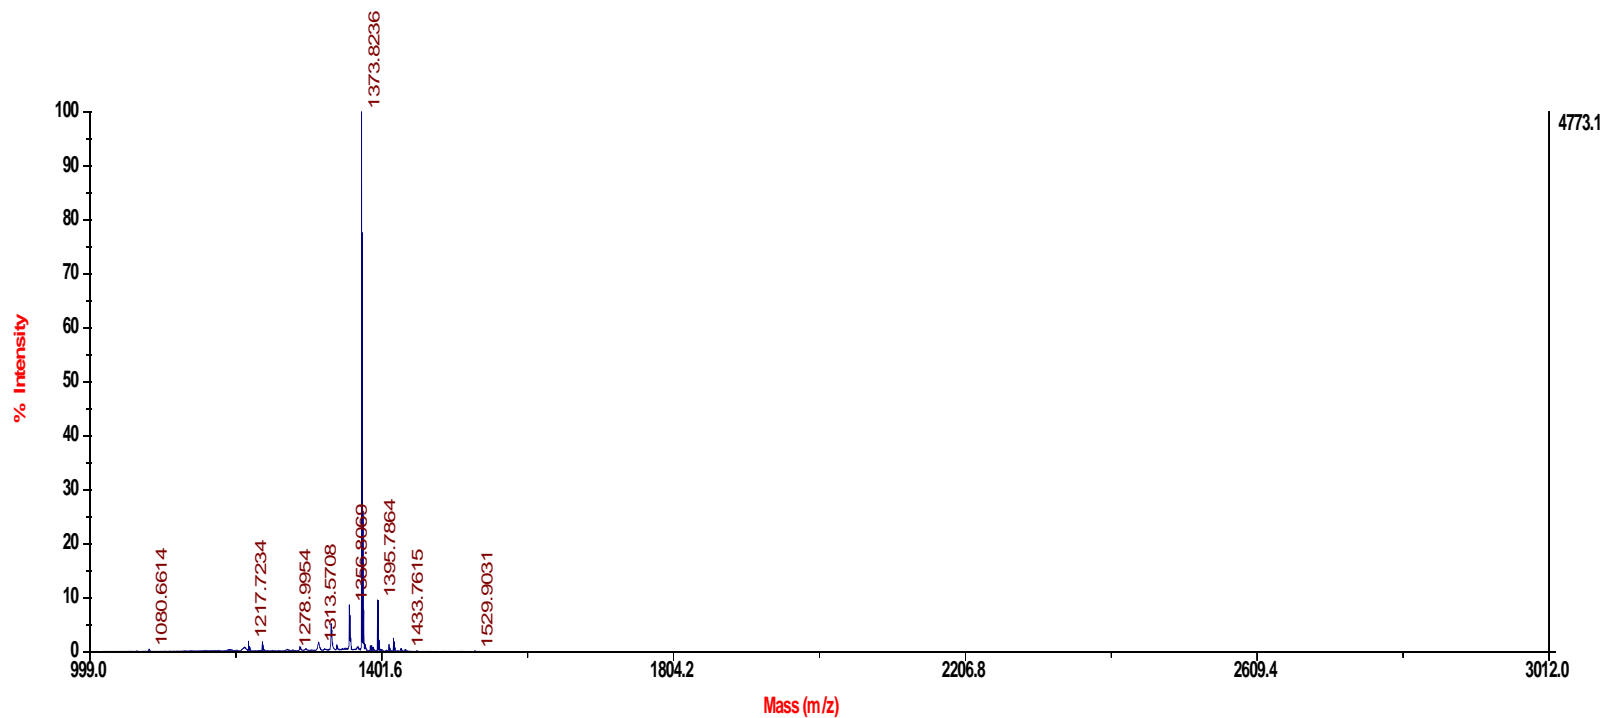

## 8. C<sub>14</sub><sup>-</sup>(HR)<sub>4</sub>

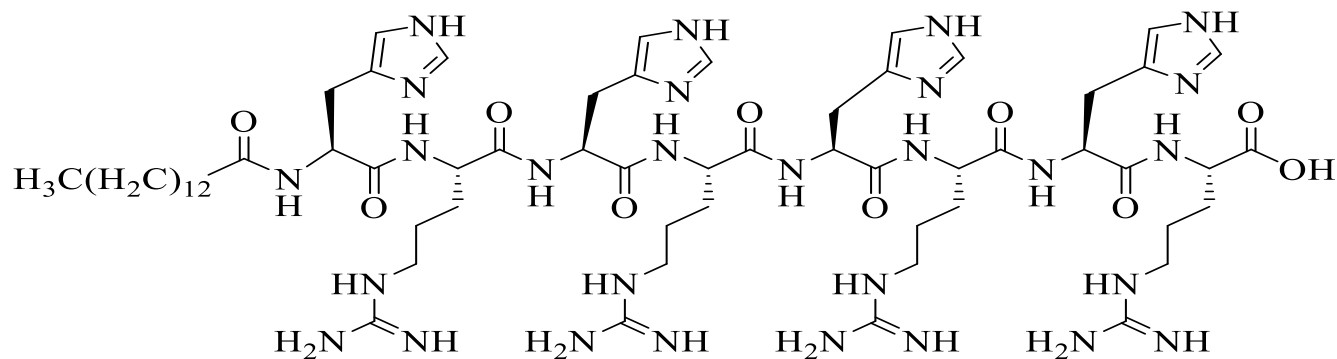

Chemical Formula: C<sub>62</sub>H<sub>104</sub>N<sub>28</sub>O<sub>10</sub>

Exact Mass: 1400.8490

TOF/TOF™ Reflector Spec #1 [BP = 1401.7, 4004]

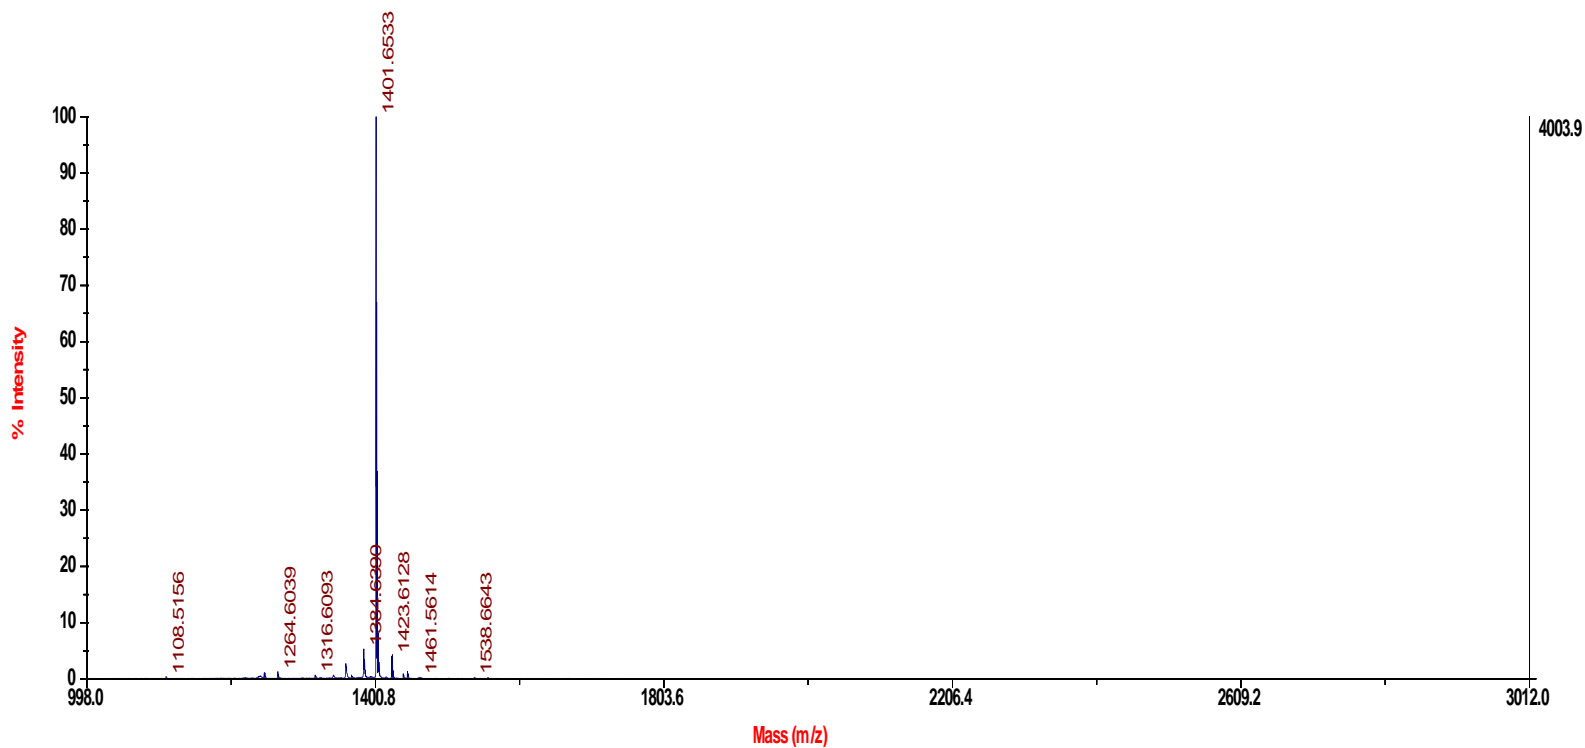

## 9. C<sub>16</sub><sup>-</sup>(HR)<sub>4</sub>

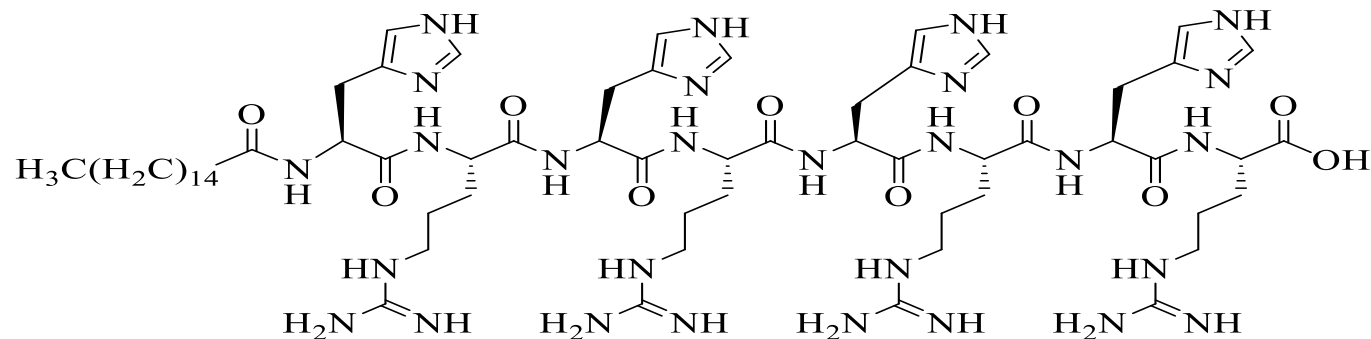

Chemical Formula: C<sub>64</sub>H<sub>108</sub>N<sub>28</sub>O<sub>10</sub>

Exact Mass: 1428.8803

TOF/TOF™ Reflector Spec #1[BP= 1429.9, 17771]

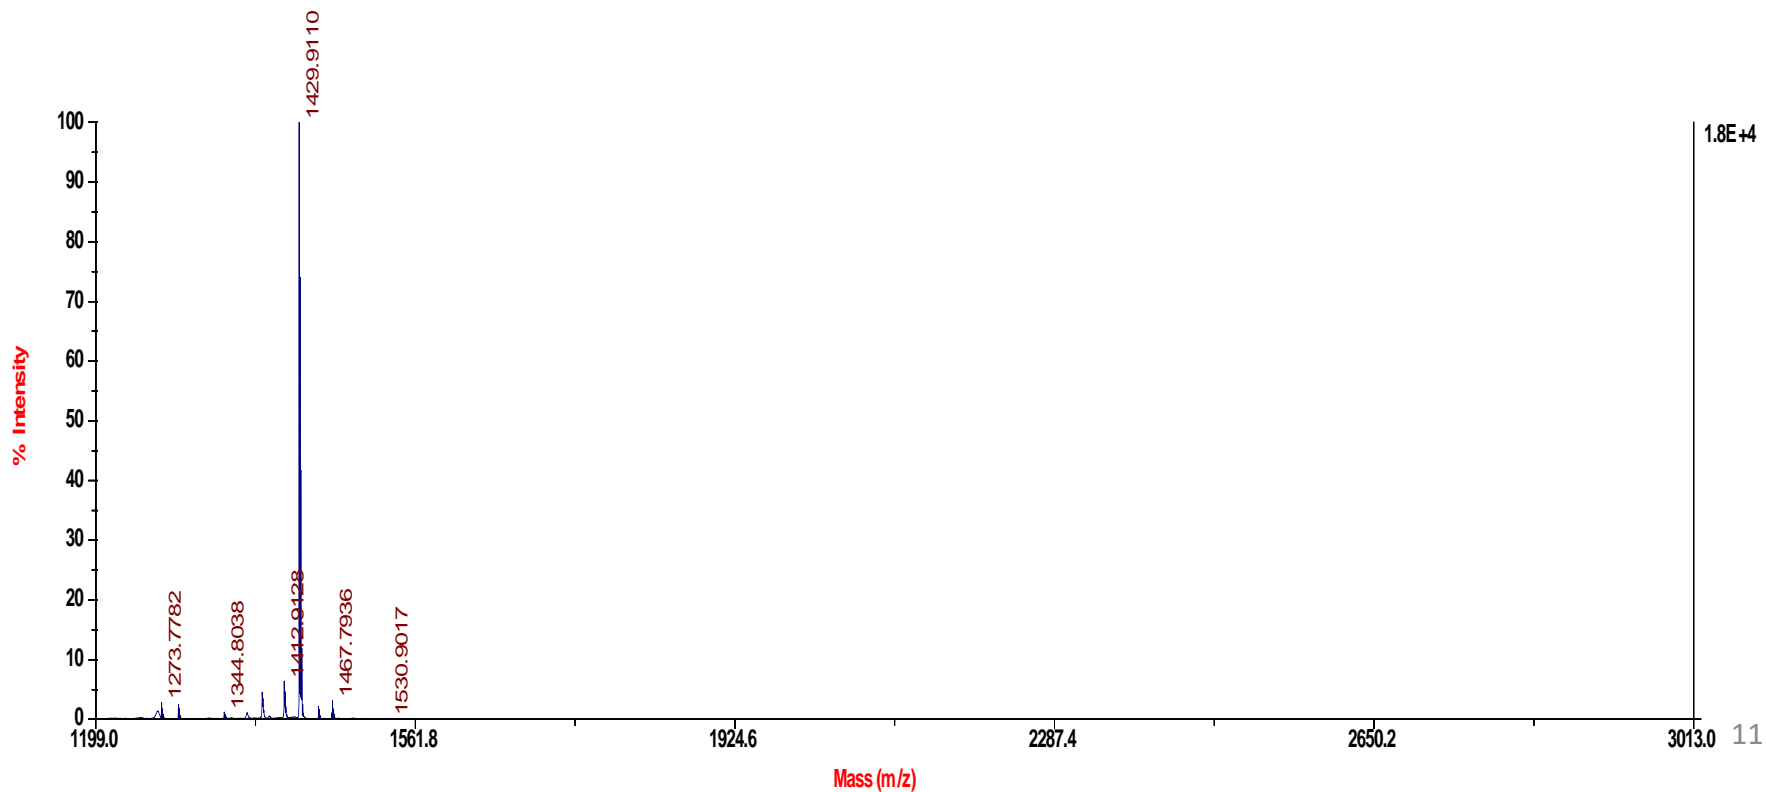

# 10. C<sub>18</sub><sup>-</sup>(HR)<sub>4</sub>

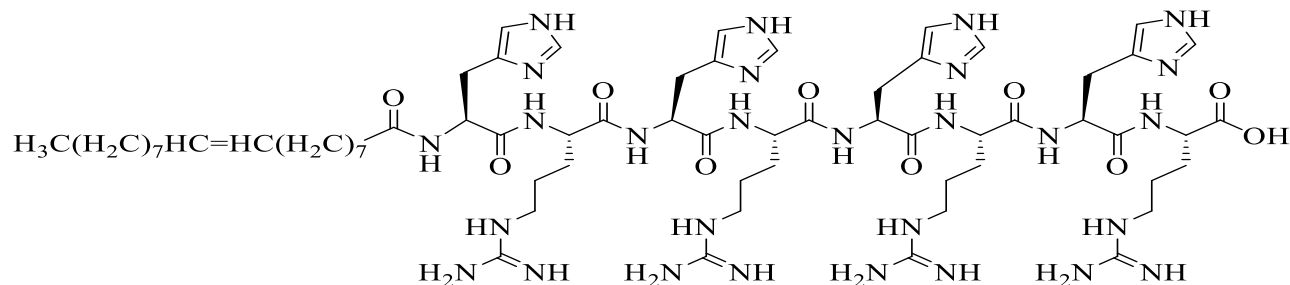

Chemical Formula: C<sub>66</sub>H<sub>110</sub>N<sub>28</sub>O<sub>10</sub>  
Exact Mass: 1454.8960

TOF/TOF™ Reflector Spec #1[BP = 1455.6, 69984]

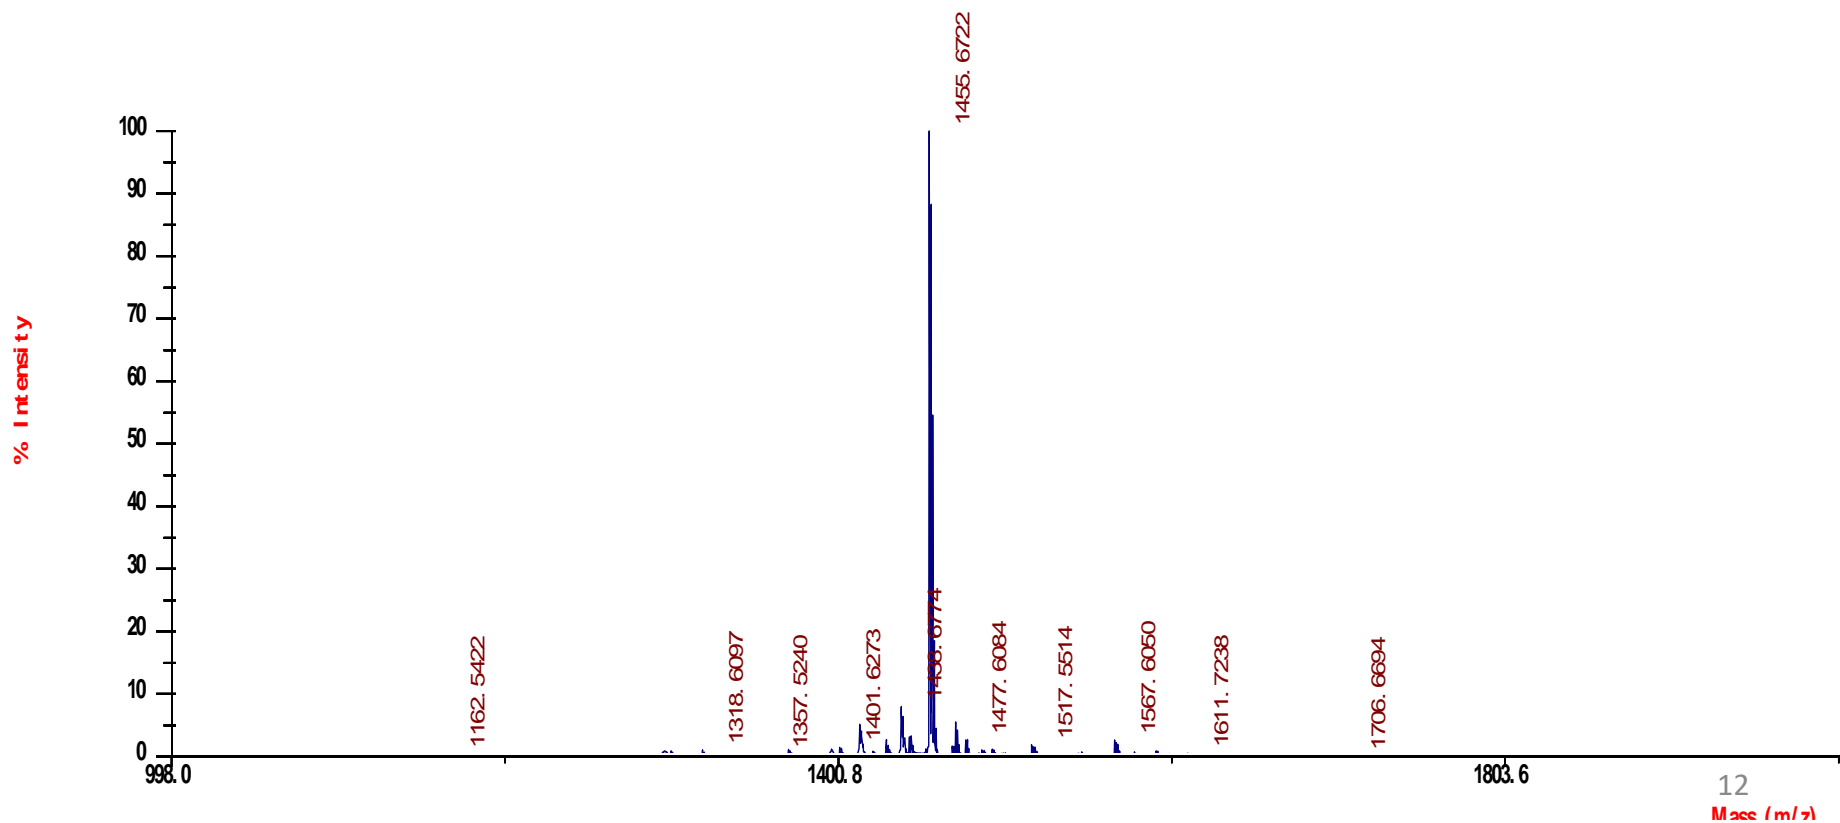

# 11. C<sub>20</sub>-(HR)<sub>4</sub>

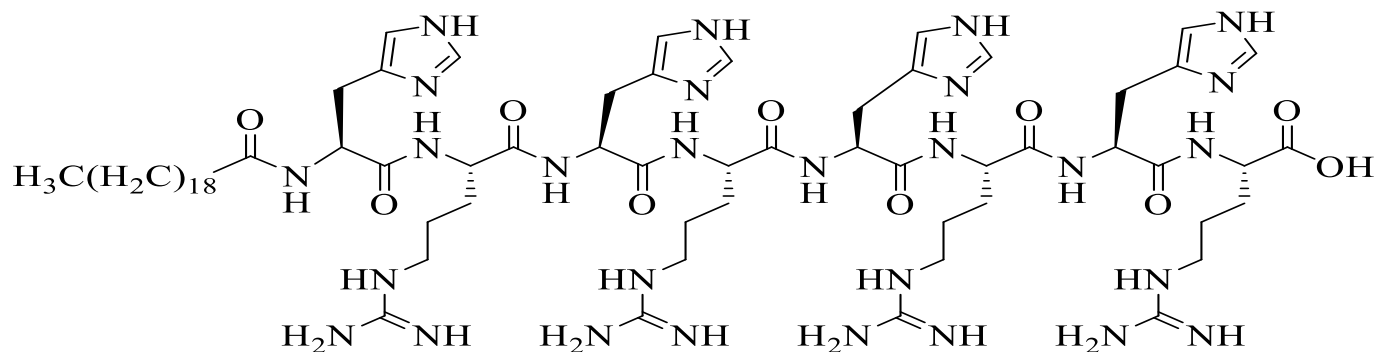

Chemical Formula: C<sub>68</sub>H<sub>116</sub>N<sub>28</sub>O<sub>10</sub>

Exact Mass: 1484.9429

TOF/TOF™ Reflector Spec #1[BP = 1485.8, 29011]

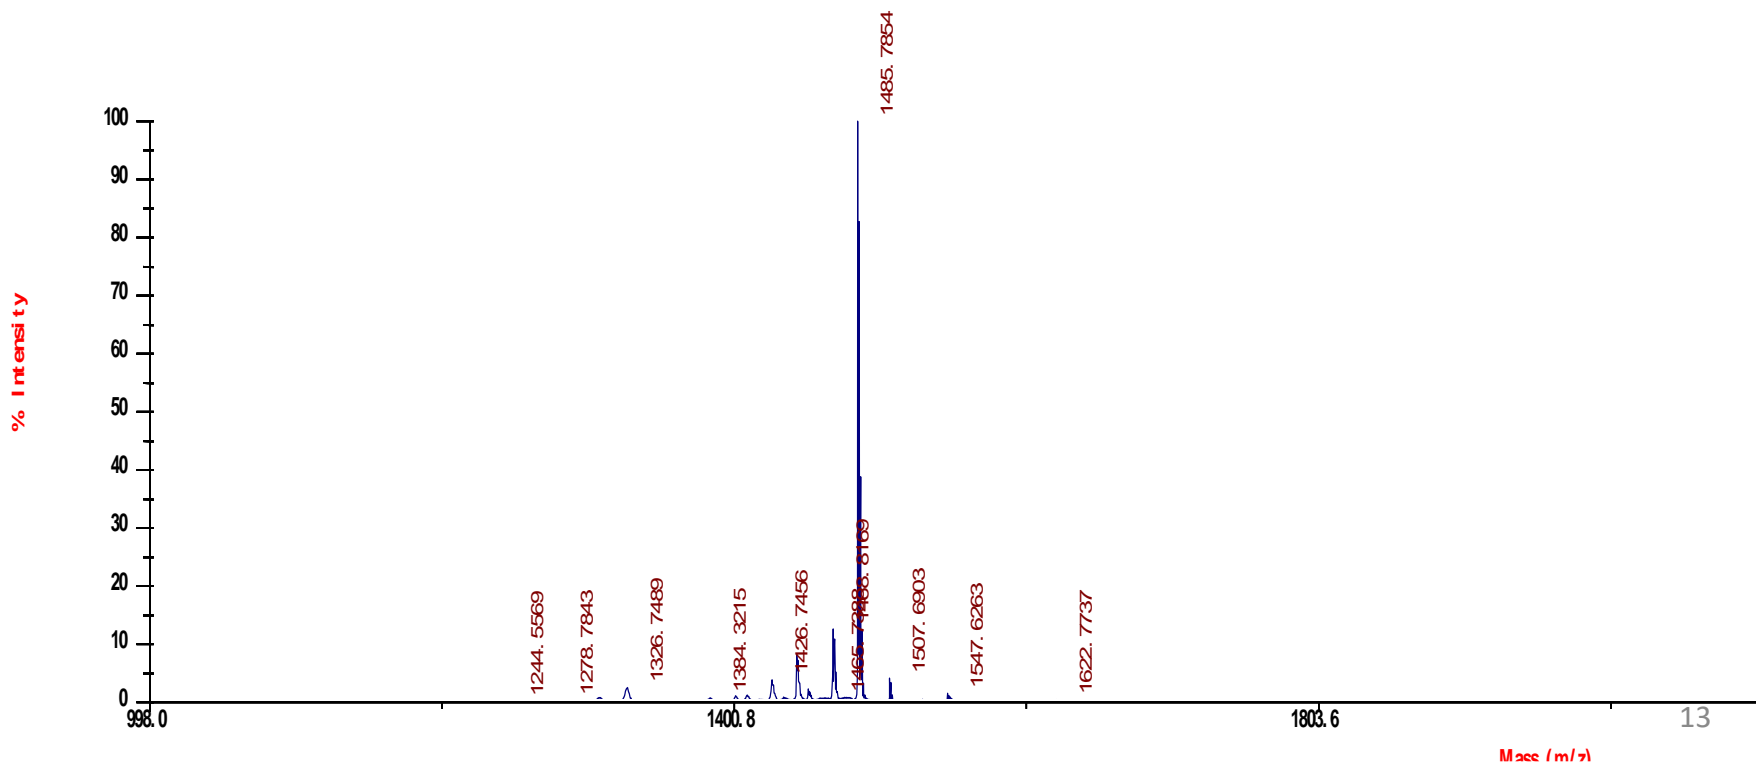

# 11. C<sub>20</sub>-(HR)<sub>2</sub>

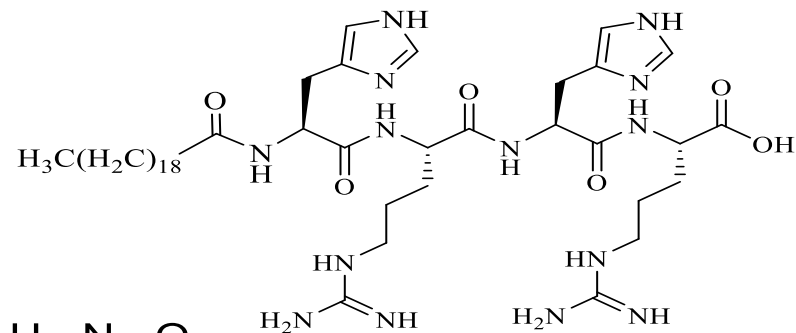

Chemical Formula: C<sub>44</sub>H<sub>78</sub>N<sub>14</sub>O<sub>6</sub>

Exact Mass: 898.6229

[21437, 899.4[BP = 1 TOF/TOF™ Reflector Spec #

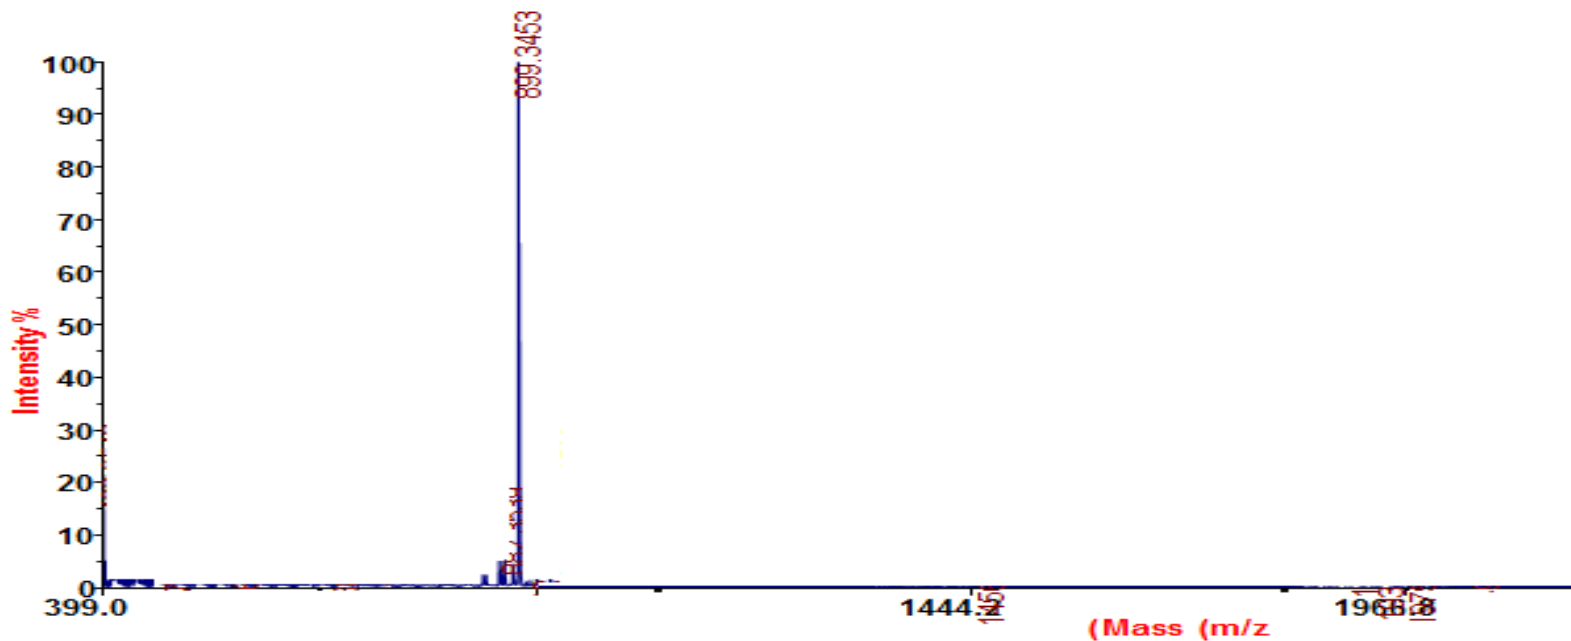

## 12. C<sub>20</sub>-(HR)<sub>3</sub>

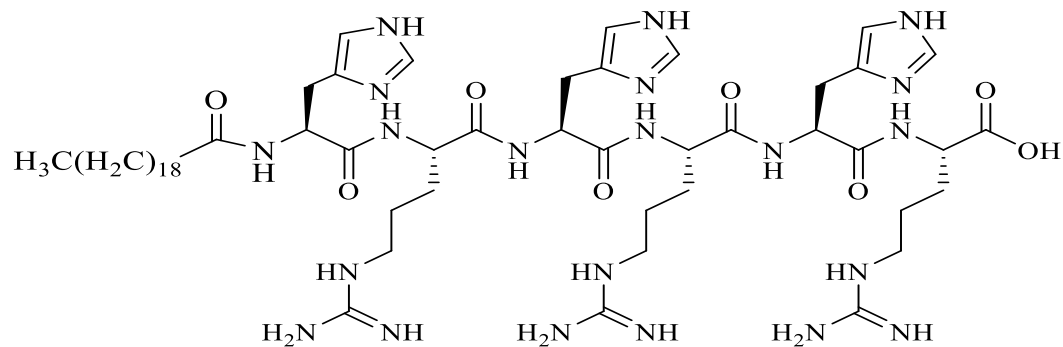

Chemical Formula: C<sub>56</sub>H<sub>97</sub>N<sub>21</sub>O<sub>8</sub>

Exact Mass: 1191.7829

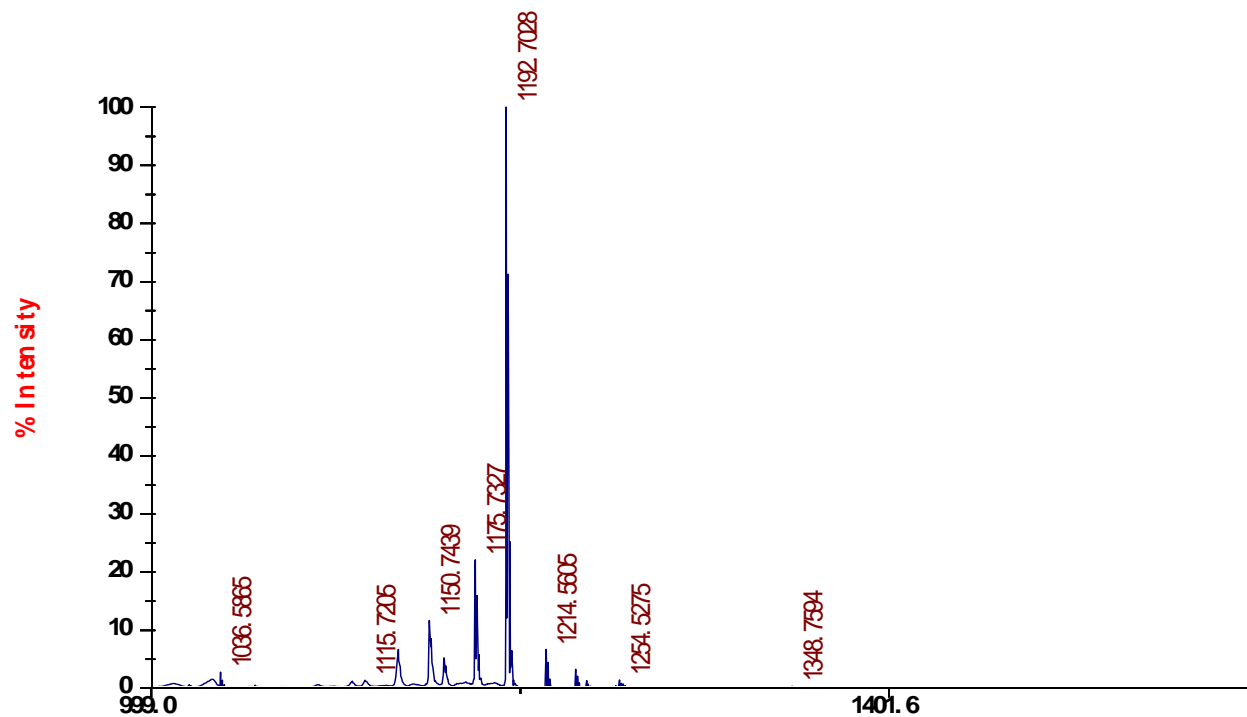

### 13. C<sub>20</sub>-(HR)<sub>5</sub>

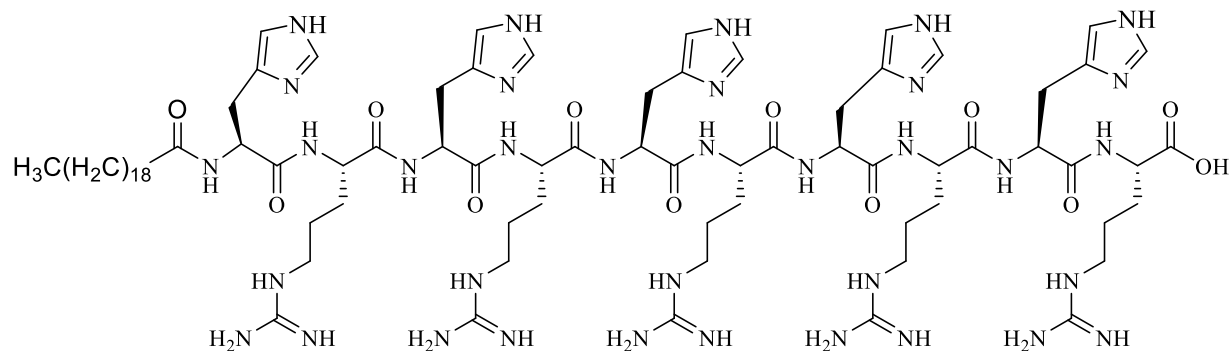

Chemical Formula: C<sub>80</sub>H<sub>135</sub>N<sub>35</sub>O<sub>12</sub>

Exact Mass: 1778.1029

TOF/TOF™ Reflector Spec #1[BP = 1779.8, 5937]

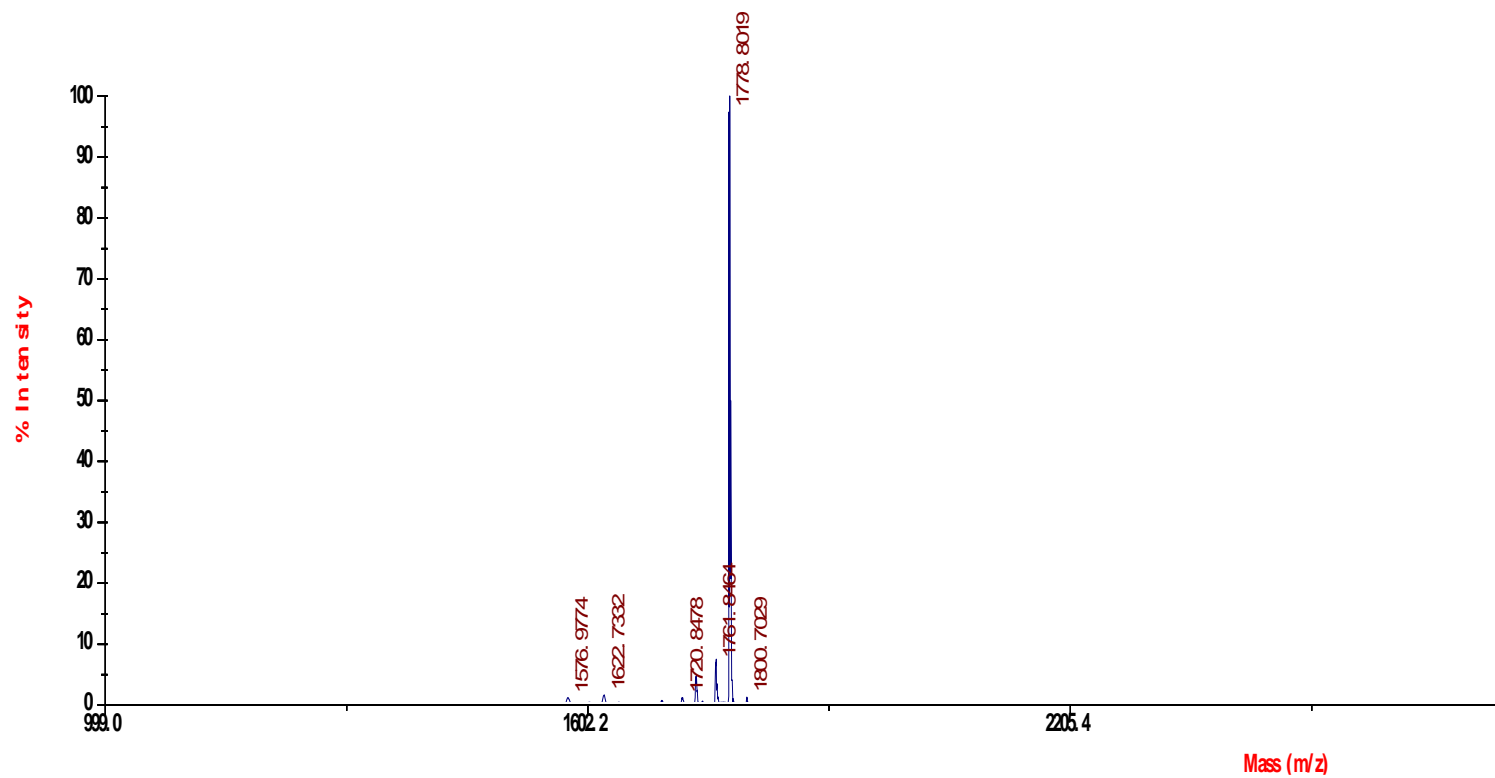

Supplement: molecules-23-01590-s001.pdf [file molecules-23-01590-s001.pdf]
